# Supplementary material for: Determination of thirteen antibiotics in drug products – A new LC-MS/MS tool for screening drug product quality
Source: Royal Society of Chemistry journal article supplement (doi:10.1039/c4ay00748d), 2014-01-01

1 **Electronic Supplementary Information (ESI)**

2

3 Determination of thirteen antibiotics in drug products – a new LC-MS/MS tool for screening drug product  
4 quality

5

6 *Samuel Oppong Bekoe<sup>1,2,\*</sup>, Søren Alex Bak<sup>1</sup>, Erland Björklund<sup>1,#</sup>, Kristine A Krogh<sup>1</sup>, Nathaniel NNA Okine<sup>2</sup>,*  
7 *Reimmiel K Adosraku<sup>2</sup>, Bjarne Styrishave<sup>1</sup>, Martin Hansen<sup>1,†,\*</sup>*

8

9 <sup>1</sup>Toxicology Laboratory, Department of Pharmacy, Faculty of Health and Medical Sciences, University of  
10 Copenhagen, Denmark Universitetsparken 2, DK-2100 Copenhagen, Denmark

11 <sup>2</sup>Department of Pharmaceutical Chemistry, Faculty of Pharmacy and Pharmaceutical Sciences, Kwame  
12 Nkrumah University of Science and Technology, Kumasi, Ghana.

13

14 <sup>#</sup>Present address: School of Education and Environment, Division of Natural Sciences, Kristianstad  
15 University, SE-291 88 Kristianstad, Sweden.

16 <sup>†</sup>Present addresses: Institute for Environmental Sciences and Engineering, 410 O'Brien Hall, University of  
17 California, Berkeley, CA 94720, United States. Department of Integrative Biology, 3040 Valley Life  
18 Sciences Building, University of California, Berkeley, CA 94720, United States. Department of Civil &  
19 Environmental Engineering, Yang & Yamazaki Environment & Energy Bldg. 473 Via Ortega, Stanford  
20 University, Stanford, CA 94305, United States. Department of Growth and Reproduction, Copenhagen  
21 University Hospital, Blegdamsvej 9, DK-2100, Denmark.

23

---

\* Samuel Oppong Bekoe, sobek03@yahoo.com. Martin Hansen, martin.hansen@sund.ku.dk, martin.hansen@berkeley.edu.

24 **Figure ESI-1.** Sample preparation flow diagram for the developed methodology.

25

26

28

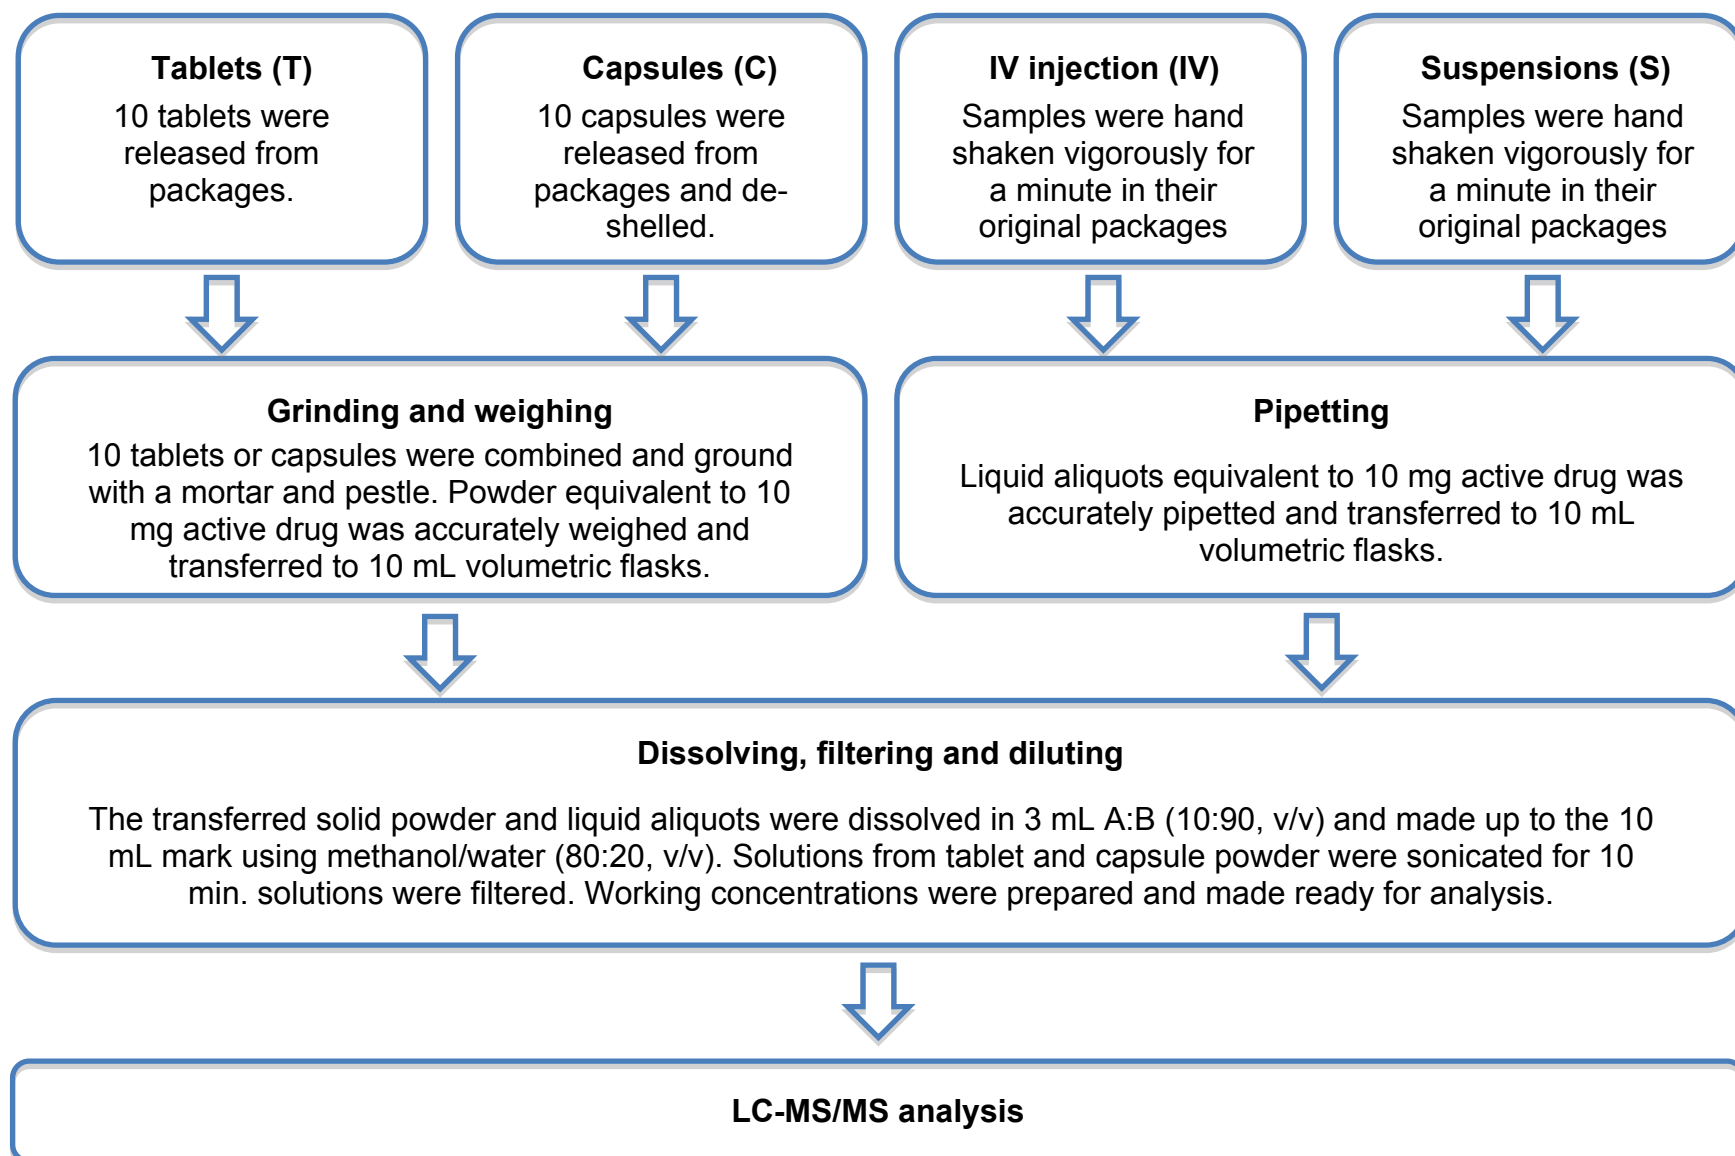

Supplement: c4ay00748d1.pdf [file c4ay00748d1.pdf]
